# Supplementary material for: Effects of maternal obesity on Wharton’s Jelly mesenchymal stromal cells
Source: PubMed Central journal article supplement (PMC5730612; doi:10.1038/s41598-017-18034-1), 2017-12-14
Supplement: 41598_2017_18034_MOESM1_ESM.pdf [file 41598_2017_18034_MOESM1_ESM.pdf]

# Supplementary Information

## Effects of maternal obesity on Wharton's Jelly mesenchymal stromal cells

Heba Badraiq<sup>1</sup>, Aleksandra Cvorov<sup>2</sup>, Antonio Galleu<sup>3</sup>, Marisa Simon<sup>2</sup>, Cristian Miere<sup>1</sup>, Carl Hobbs<sup>4</sup>, Reiner Schulz<sup>5</sup>, Richard Siow<sup>6</sup>, Francesco Dazzi<sup>3</sup>, Dusko Ilic<sup>1</sup>

<sup>1</sup>Stem Cell Laboratory, Assisted Conception Unit, Division of Women's Health, Women's Health Academic Centre, Faculty of Life Sciences & Medicine, King's College London, London, UK.

<sup>2</sup>Genomic Medicine, Houston Methodist Research Institute, Houston, Texas, USA.

<sup>3</sup>Department of Haemato-Oncology, Rayne Institute, Faculty of Life Sciences & Medicine, King's College London, London, UK.

<sup>4</sup>Histology Laboratory, Wolfson Centre for Age-Related Diseases, Faculty of Life Sciences & Medicine, King's College London, London, UK.

<sup>5</sup>Department of Medical and Molecular Genetics, Division of Genetics and Molecular Medicine, and

<sup>6</sup>Cardiovascular Division, Faculty of Life Sciences & Medicine, King's College London, London, UK.

Correspondence: Dusko Ilic, E-mail: [dusko.ilic@kcl.ac.uk](mailto:dusko.ilic@kcl.ac.uk)

| Non-obese |     |     |           | Obese |     |     |                 |
|-----------|-----|-----|-----------|-------|-----|-----|-----------------|
| DONOR     | AGE | BMI | ETHNICITY | DONOR | AGE | BMI | ETHNICITY       |
| 1         | 43  | 24  | Caucasian | 1     | 39  | 36  | Caucasian       |
| 2         | 35  | 21  | Caucasian | 2     | 35  | 30  | Caucasian       |
| 3         | 36  | 22  | Caucasian | 3     | 34  | 39  | Caucasian       |
| 4         | 35  | 21  | Caucasian | 4     | 34  | 30  | African black   |
| 5         | 38  | 25  | Caucasian | 5     | 38  | 45  | African black   |
| 6         | 39  | 23  | Caucasian | 6     | 28  | 41  | Caribbean black |
| 7         | 39  | 23  | Caucasian | 7     | 35  | 35  | Caribbean black |

**Figure S1. Donor information**



**Figure S2. Propensity towards adipogenic differentiation**

(A) Intracellular lipid droplets visualized with a fluorescent LipidTOX™ Green in WJ MSC from non-obese donor O1 following proadipogenic differentiation. Undifferentiated cells exposed to the fluorescent dye were used as a negative control to determine a level of background fluorescence.

(B) Quantitative analysis of lipid content per cell did not find any significant difference between samples isolated from non-obese ( $2.39 \pm 1.35\%$ ,  $n=7$ ) and obese donors ( $2.28 \pm 1.10\%$ ,  $n=7$ ).

A

| Channel | Intensity      | Expected Value | Average values | Results |
|---------|----------------|----------------|----------------|---------|
| Green   | DNP high       | <1000          | 70             | Passed  |
| Green   | DNP background | <1000          | 76             | Passed  |
| Green   | Biotin (high)  | >3000          | 10328          | Passed  |
| Green   | Biotin (bkgd)  | <1000          | 40             | Passed  |
| Red     | DNP high       | >3000          | 6031           | Passed  |
| Red     | DNP background | <1000          | 55             | Passed  |
| Red     | Biotin (high)  | <1000          | 112            | Passed  |
| Red     | Biotin (bkgd)  | <1000          | 48             | Passed  |



B

| Channel | Intensity | Expected Value | Average value | Results |
|---------|-----------|----------------|---------------|---------|
| Green   | A         | <2000          | 545           | Passed  |
| Green   | T         | <2000          | 472           | Passed  |
| Green   | C         | >20000         | 30512         | Passed  |
| Green   | A         | >20000         | 29480         | Passed  |
| Red     | T         | >20000         | 24115         | Passed  |
| Red     | T         | >20000         | 26279         | Passed  |
| Red     | C         | <2000          | 1762          | Passed  |
| Red     | G         | <2000          | 1596          | Passed  |



C

| Channel | Nucleotide | Expected Value | Average value | Results |
|---------|------------|----------------|---------------|---------|
| Red     | A          | >5000          | 9066          | Passed  |
| Red     | T          | >5000          | 11410         | Passed  |
| Red     | C          | <2000          | 525           | Passed  |
| Red     | G          | <2000          | 688           | Passed  |
| Green   | A          | <2000          | 828           | Passed  |
| Green   | T          | <2000          | 971           | Passed  |
| Green   | C          | >5000          | 13087         | Passed  |
| Green   | G          | >5000          | 9153          | Passed  |



D

| Channel | Target Removal Control | Expected Value | Average value | Results |
|---------|------------------------|----------------|---------------|---------|
| Green   | 1                      | <1200          | 355           | Passed  |
| Green   | 2                      | <1200          | 485           | Passed  |



E

| Channel | Hyb control concentration | Expected Value | Average value | Results |
|---------|---------------------------|----------------|---------------|---------|
| Green   | Low                       | <10000         | 8446          | Passed  |
| Green   | Medium                    | <20000         | 16436         | Passed  |
| Green   | High                      | >20000         | 27350         | Passed  |



F



G

| Channel | Probe    | Expected Value | Average value | Results |
|---------|----------|----------------|---------------|---------|
| Green   | C1       | >5000          | 11113         | Passed  |
| Green   | C2       | >5000          | 11519         | Passed  |
| Green   | C3       | >5000          | 14438         | Passed  |
| Red     | C4       | >5000          | 11475         | Passed  |
| Red     | C5       | >5000          | 8119          | Passed  |
| Red     | C6       | >5000          | 10924         | Passed  |
| Green   | U1 to U6 | <1000          | 498           | Passed  |
| Red     | U1 to U6 | <1000          | 574           | Passed  |



H

| Channel | Probe | Expected Value | Average value | Result |
|---------|-------|----------------|---------------|--------|
| Green   | 1     | <3000          | 1628          | Passed |
| Green   | 2     | <3000          | 594           | Passed |
| Green   | 3     | <3000          | 1442          | Passed |
| Green   | 4     | <3000          | 540           | Passed |
| Red     | 1     | >5000          | 10278         | Passed |
| Red     | 2     | >5000          | 10747         | Passed |
| Red     | 3     | >5000          | 7162          | Passed |
| Red     | 4     | >5000          | 9796          | Passed |

|                    |
|--------------------|
| BS Conversion II-1 |
| BS Conversion II-2 |
| BS Conversion II-3 |
| BS Conversion II-4 |



I



J

| Channel | Probe | Expected Value | Average value | Results |
|---------|-------|----------------|---------------|---------|
| Green   | 1     | <3000          | 482           | Passed  |
| Green   | 2     | <3000          | 426           | Passed  |
| Green   | 3     | <3000          | 385           | Passed  |
| Red     | 1     | >5000          | 10006         | Passed  |
| Red     | 2     | >5000          | 7463          | Passed  |
| Red     | 3     | >5000          | 8951          | Passed  |

|               |
|---------------|
| Specificity 1 |
| Specificity 2 |
| Specificity 3 |



K



**Figure S3. The DNA methylation array passed all quality control parameters examined.**

(A) Staining control: Measures the efficiency of the staining step. It is independent of other sample independent controls and data is monitored in both the green and red channel of the iscan during scanning.

(B) Extension control: Tests the efficiency of the single base extension procedure of nucleotides using a hairpin probe. A and T are monitored in the red channel and C and G are monitored in the green channel.

(C) Non-Polymorphic Controls: test the overall performance of the assay, from amplification to detection, by querying a particular base in a non-polymorphic region of the human genome. Non-polymorphic Controls are used to compare assay performance across different samples. A and T are monitored in the red channel, and C and G in the green channel.

(D) Target removal control: Tests the efficiency of the stripping step of excess DNA after the single base extension and is tested only in the green channel.

(E) Hybridisation control: Measures the performance of the Infinium array using synthetic targets to probes on the array with a perfect match, these are tested at three different concentrations, high (5 pM), medium (1 pM) and low (0.2 pM) concentrations. The hybridisation control is only tested for in the green channel.

(F) Detected CpG sites: shows plot of detected CpG sites at 0.01 and 0.05 level.

(G) Bisulfite conversion control 1: Infinium 1 probe design and allele specific single base extension are used to monitor the success of the bisulfite conversion. If the bisulfite conversion reaction was successful the C (converted) probes will match the converted sequence and extend if the bisulfite conversion was not successful then the unconverted (U) probes will get extended.

(H) Bisulfite Conversion control 2: Infinium II probe design and single base extension to monitor the success of the bisulfite conversion, if the conversion is successful the A base will get

incorporated and the probe will have intensity in the red channel, if the sample has any unconverted DNA the G base will get incorporated and the probe will have elevated signal in the green channel.

(I) Specificity Control 1: are designed to monitor the allele specific extension for Infinium I probes and uses G/T mismatch controls to check for nonspecific detection of methylation signal over unmethylated background. PM controls correspond to A/T perfect match and should give high signal, MM controls correspond to G/T mismatch controls.

(J) Specificity control 2: are designed to measure the specificity of Infinium II probes during single base extension and highlights any non-specific detection of methylation signal over unmethylated background. Infinium II probes incorporate the A base across the non-polymorphic T and show high signal in the red channel and if the incorporation is non-specific the probe will have a high signal in the green channel.

(K) Negative Control - Average and StdDev values should have intensity lower than 600.



**Figure S4. List and genomic distribution of genes with significant methylation differences**

(A) Functional genomic distribution of significantly hyper- and hypomethylated CpG sites was quite similar. CpG content and neighbourhood context did not show much difference either. Altered methylation state was spread across all chromosomes, with chromosomes 1, 2 and 6 harbouring the most hyper- and hypomethylated CpG sites.

| Gene Name | Number of CpG sites | Not significant sites (less than 4 donors with methylation difference $\geq 0,20$ ) |                                                 | Significant sites (4 or more donors with methylation difference $\geq 0,20$ ) |                                                 |                                               |
|-----------|---------------------|-------------------------------------------------------------------------------------|-------------------------------------------------|-------------------------------------------------------------------------------|-------------------------------------------------|-----------------------------------------------|
|           |                     | Number of sites                                                                     | Number of sites present in polymorphic CpG list | Number of sites                                                               | Number of sites present in polymorphic CpG list | All significant site in polymorphic CpG list? |
| ADAMTS16  | 14                  | 13                                                                                  | 3                                               | 1                                                                             | 1                                               | Yes                                           |
| AGPAT9    | 2                   | 1                                                                                   | 0                                               | 1                                                                             | 1                                               | Yes                                           |
| AHRR      | 83                  | 82                                                                                  | 23                                              | 1                                                                             | 0                                               | No                                            |
| ARHGAP22  | 28                  | 27                                                                                  | 3                                               | 1                                                                             | 1                                               | Yes                                           |
| ARHGEF10  | 81                  | 80                                                                                  | 19                                              | 1                                                                             | 0                                               | No                                            |
| BRDT      | 4                   | 3                                                                                   | 0                                               | 1                                                                             | 1                                               | Yes                                           |
| C14orf119 | 3                   | 2                                                                                   | 0                                               | 1                                                                             | 1                                               | Yes                                           |
| C2orf69   | 4                   | 3                                                                                   | 1                                               | 1                                                                             | 0                                               | No                                            |
| C8orf12   | 10                  | 9                                                                                   | 1                                               | 1                                                                             | 1                                               | Yes                                           |
| CARS2     | 24                  | 23                                                                                  | 5                                               | 1                                                                             | 1                                               | Yes                                           |
| CDH4      | 70                  | 69                                                                                  | 13                                              | 1                                                                             | 1                                               | Yes                                           |
| CDKL1     | 2                   | 1                                                                                   | 0                                               | 1                                                                             | 1                                               | Yes                                           |
| CHST11    | 16                  | 15                                                                                  | 3                                               | 1                                                                             | 0                                               | No                                            |
| CLIP2     | 20                  | 19                                                                                  | 4                                               | 1                                                                             | 1                                               | Yes                                           |
| CTBP1     | 35                  | 34                                                                                  | 8                                               | 1                                                                             | 1                                               | Yes                                           |
| CYP2E1    | 17                  | 16                                                                                  | 1                                               | 1                                                                             | 0                                               | No                                            |
| DCAF11    | 6                   | 5                                                                                   | 1                                               | 1                                                                             | 1                                               | Yes                                           |
| DCAF6     | 1                   | 0                                                                                   | 0                                               | 1                                                                             | 0                                               | No                                            |
| DENND3    | 55                  | 54                                                                                  | 11                                              | 1                                                                             | 1                                               | Yes                                           |
| DOCK2     | 19                  | 18                                                                                  | 4                                               | 1                                                                             | 1                                               | Yes                                           |
| EYA4      | 36                  | 35                                                                                  | 4                                               | 1                                                                             | 0                                               | No                                            |
| GALNT9    | 116                 | 115                                                                                 | 30                                              | 1                                                                             | 1                                               | Yes                                           |
| GHRL      | 7                   | 6                                                                                   | 2                                               | 1                                                                             | 1                                               | Yes                                           |
| GPR37     | 7                   | 6                                                                                   | 1                                               | 1                                                                             | 1                                               | Yes                                           |
| GRID2     | 20                  | 19                                                                                  | 3                                               | 1                                                                             | 1                                               | Yes                                           |
| HLA-DPA1  | 24                  | 23                                                                                  | 10                                              | 1                                                                             | 1                                               | Yes                                           |
| HOOK2     | 14                  | 13                                                                                  | 2                                               | 1                                                                             | 0                                               | No                                            |
| IGSF21    | 36                  | 35                                                                                  | 5                                               | 1                                                                             | 1                                               | Yes                                           |
| ITGB2     | 21                  | 20                                                                                  | 3                                               | 1                                                                             | 1                                               | Yes                                           |
| KCNS3     | 10                  | 9                                                                                   | 1                                               | 1                                                                             | 1                                               | Yes                                           |
| KCTD5     | 16                  | 15                                                                                  | 2                                               | 1                                                                             | 1                                               | Yes                                           |
| LAMB1     | 11                  | 10                                                                                  | 2                                               | 1                                                                             | 1                                               | Yes                                           |
| LILRA6    | 3                   | 2                                                                                   | 0                                               | 1                                                                             | 1                                               | Yes                                           |
| MAD1L1    | 305                 | 303                                                                                 | 55                                              | 2                                                                             | 1                                               | No                                            |
| MTRR      | 3                   | 2                                                                                   | 1                                               | 1                                                                             | 0                                               | No                                            |
| MYO10     | 32                  | 31                                                                                  | 9                                               | 1                                                                             | 1                                               | Yes                                           |
| NDUFS6    | 20                  | 19                                                                                  | 4                                               | 1                                                                             | 1                                               | Yes                                           |
| NEK9      | 8                   | 7                                                                                   | 2                                               | 1                                                                             | 1                                               | Yes                                           |
| NPSR1     | 4                   | 3                                                                                   | 0                                               | 1                                                                             | 1                                               | Yes                                           |
| NRGN      | 7                   | 6                                                                                   | 0                                               | 1                                                                             | 1                                               | Yes                                           |
| NTM       | 87                  | 86                                                                                  | 25                                              | 1                                                                             | 1                                               | Yes                                           |
| OTOF      | 11                  | 10                                                                                  | 0                                               | 1                                                                             | 1                                               | Yes                                           |
| PDHA2     | 3                   | 2                                                                                   | 1                                               | 1                                                                             | 1                                               | Yes                                           |
| PNPLA7    | 20                  | 19                                                                                  | 4                                               | 1                                                                             | 0                                               | No                                            |
| PTGFRN    | 13                  | 12                                                                                  | 2                                               | 1                                                                             | 1                                               | Yes                                           |
| RADIL     | 41                  | 40                                                                                  | 10                                              | 1                                                                             | 1                                               | Yes                                           |
| RPL13AP3  | 5                   | 4                                                                                   | 0                                               | 1                                                                             | 1                                               | Yes                                           |
| SDK1      | 113                 | 112                                                                                 | 29                                              | 1                                                                             | 0                                               | No                                            |
| SEPT8     | 11                  | 10                                                                                  | 1                                               | 1                                                                             | 0                                               | No                                            |
| SERPINE2  | 12                  | 11                                                                                  | 2                                               | 1                                                                             | 0                                               | No                                            |
| SIM2      | 39                  | 38                                                                                  | 2                                               | 1                                                                             | 0                                               | No                                            |
| SLC23A2   | 9                   | 8                                                                                   | 0                                               | 1                                                                             | 1                                               | Yes                                           |
| STT3A     | 5                   | 4                                                                                   | 1                                               | 1                                                                             | 1                                               | Yes                                           |
| TGFBR3    | 20                  | 19                                                                                  | 4                                               | 1                                                                             | 1                                               | Yes                                           |
| THUMPD1   | 6                   | 5                                                                                   | 1                                               | 1                                                                             | 1                                               | Yes                                           |
| TM2D2     | 2                   | 1                                                                                   | 0                                               | 1                                                                             | 1                                               | Yes                                           |
| TMEM44    | 16                  | 15                                                                                  | 5                                               | 1                                                                             | 0                                               | No                                            |
| TNS1      | 25                  | 24                                                                                  | 6                                               | 1                                                                             | 1                                               | Yes                                           |
| TOP1MT    | 17                  | 16                                                                                  | 4                                               | 1                                                                             | 1                                               | Yes                                           |
| TRIM10    | 36                  | 32                                                                                  | 3                                               | 4                                                                             | 1                                               | No                                            |
| TRPC5     | 5                   | 4                                                                                   | 0                                               | 1                                                                             | 1                                               | Yes                                           |
| WDR27     | 37                  | 36                                                                                  | 4                                               | 1                                                                             | 1                                               | Yes                                           |
| ZDHC14    | 38                  | 37                                                                                  | 6                                               | 1                                                                             | 1                                               | Yes                                           |
| ZNF117    | 5                   | 4                                                                                   | 4                                               | 1                                                                             | 1                                               | Yes                                           |
| ZNF670    | 5                   | 4                                                                                   | 0                                               | 1                                                                             | 1                                               | Yes                                           |
| ZNF714    | 5                   | 0                                                                                   | 0                                               | 5                                                                             | 0                                               | No                                            |
| ZNF783    | 12                  | 11                                                                                  | 3                                               | 1                                                                             | 1                                               | Yes                                           |

(B) List of the genes with significantly different methylation of at least one CpG site in four or more donors.



**Figure 5. Heat map and a list of the genes with a significantly different transcriptome level**

(A) Heat map shows that samples for all obese donors cluster together except one (O3).

| Probe Id     | Symbol      | FC   | P.Value  | Probe Id     | Symbol     | FC   | P.Value  | Probe Id     | Symbol     | FC   | P.Value  |
|--------------|-------------|------|----------|--------------|------------|------|----------|--------------|------------|------|----------|
| ILMN_1286216 | GOLPH4      | 5.75 | 4.85E-05 | ILMN_1750324 | IGFBP5     | 1.64 | 7.15E-03 | ILMN_1664464 | PTGDS      | 2.12 | 1.21E-02 |
| ILMN_1693338 | CYP11B1     | 4.26 | 8.04E-10 | ILMN_1665601 | DUSP5      | 1.64 | 3.25E-03 | ILMN_1760990 | SH3GL3     | 2.00 | 3.02E-05 |
| ILMN_1830462 | XYLT1       | 3.88 | 6.22E-05 | ILMN_1788107 | IL11       | 1.64 | 1.28E-06 | ILMN_1789639 | FMOD       | 1.97 | 1.03E-02 |
| ILMN_1726448 | MMP1        | 3.20 | 2.54E-04 | ILMN_1795344 | GOLPH4     | 1.64 | 7.65E-08 | ILMN_1781400 | SLC7A2     | 1.94 | 1.11E-02 |
| ILMN_1669046 | FOXQ1       | 3.18 | 1.24E-04 | ILMN_1784300 | TUBA4A     | 1.63 | 1.91E-04 | ILMN_1668920 | CCDC58     | 1.93 | 9.93E-03 |
| ILMN_2210519 | HAPLN1      | 3.02 | 2.60E-06 | ILMN_1683450 | CDC45      | 1.63 | 1.64E-02 | ILMN_2384745 | PSG4       | 1.89 | 3.00E-02 |
| ILMN_1707727 | ANGPTL4     | 2.66 | 3.79E-05 | ILMN_1692056 | HS3ST3A1   | 1.63 | 5.97E-04 | ILMN_1761425 | OLFML2A    | 1.87 | 4.70E-04 |
| ILMN_1770228 | KRT34       | 2.60 | 3.58E-04 | ILMN_1675453 | HHIP       | 1.63 | 2.01E-04 | ILMN_1653824 | LAMC2      | 1.87 | 3.57E-04 |
| ILMN_2352023 | RIPK5       | 2.57 | 1.99E-05 | ILMN_1756657 | RASIP1     | 1.63 | 5.32E-03 | ILMN_1668592 | STON1      | 1.86 | 2.73E-03 |
| ILMN_1716264 | ANKRD1      | 2.57 | 1.11E-04 | ILMN_2221006 | RAD21      | 1.63 | 3.23E-04 | ILMN_2404850 | RPL14      | 1.84 | 4.33E-05 |
| ILMN_1782305 | NR4A2       | 2.55 | 6.51E-08 | ILMN_1742789 | LPXN       | 1.63 | 7.30E-04 | ILMN_2053103 | SLC40A1    | 1.82 | 3.13E-03 |
| ILMN_1730645 | TMEFF2      | 2.43 | 2.63E-03 | ILMN_3240520 | ELTD1      | 1.63 | 7.03E-05 | ILMN_2181892 | BEX2       | 1.81 | 7.02E-03 |
| ILMN_2339955 | NR4A2       | 2.40 | 2.84E-10 | ILMN_1689037 | LIPG       | 1.62 | 1.41E-02 | ILMN_2336609 | SYTL2      | 1.79 | 6.72E-08 |
| ILMN_1678812 | HAPLN1      | 2.36 | 1.03E-04 | ILMN_2285568 | NAAA       | 1.62 | 1.34E-05 | ILMN_2406501 | SOD2       | 1.79 | 2.69E-03 |
| ILMN_1666733 | IL8         | 2.35 | 2.79E-03 | ILMN_1653719 | ITGBL1     | 1.62 | 1.38E-04 | ILMN_1674285 | LOC401233  | 1.78 | 4.64E-02 |
| ILMN_2184373 | IL8         | 2.24 | 2.69E-03 | ILMN_1651237 | CDT1       | 1.62 | 1.28E-02 | ILMN_1676984 | DDIT3      | 1.75 | 4.37E-06 |
| ILMN_2113490 | NTN4        | 2.22 | 5.43E-05 | ILMN_1792356 | DPYSL4     | 1.61 | 1.51E-02 | ILMN_2390853 | CTSH       | 1.74 | 2.39E-03 |
| ILMN_1658483 | IL1A        | 2.20 | 1.19E-06 | ILMN_1763390 | ISL1       | 1.61 | 3.00E-03 | ILMN_2367883 | GEM        | 1.69 | 8.73E-06 |
| ILMN_1775042 | WDR69       | 2.15 | 1.41E-05 | ILMN_1678669 | RRM2       | 1.61 | 3.20E-02 | ILMN_1665107 | ITGB1BP1   | 1.69 | 1.06E-03 |
| ILMN_1765578 | TIPARP      | 2.15 | 1.11E-13 | ILMN_2163873 | FNDCl      | 1.61 | 4.03E-03 | ILMN_1715647 | VANGL2     | 1.68 | 1.35E-02 |
| ILMN_1799569 | LOC440895   | 2.06 | 3.71E-08 | ILMN_1717541 | CNTNAP3    | 1.61 | 1.16E-04 | ILMN_1709094 | LIFR       | 1.68 | 3.94E-05 |
| ILMN_1844593 | ---         | 2.05 | 1.48E-04 | ILMN_1667594 | KLF10      | 1.61 | 3.98E-06 | ILMN_2201596 | CYTL1      | 1.67 | 6.51E-03 |
| ILMN_2374865 | ATF3        | 2.05 | 1.71E-07 | ILMN_1658494 | C13orf15   | 1.61 | 3.53E-06 | ILMN_1693270 | SUSD2      | 1.67 | 1.98E-03 |
| ILMN_1798177 | CHURC1      | 2.03 | 4.48E-04 | ILMN_1717706 | PLK2       | 1.60 | 6.17E-04 | ILMN_1740842 | SALL2      | 1.66 | 6.86E-06 |
| ILMN_1658860 | ACTC1       | 2.01 | 1.53E-02 | ILMN_1668787 | KLK3       | 1.60 | 7.20E-05 | ILMN_1677092 | GEM        | 1.66 | 2.53E-05 |
| ILMN_1676663 | TNFRSF11B   | 2.01 | 6.30E-03 | ILMN_1739001 | TACSTD2    | 1.59 | 1.22E-03 | ILMN_1748376 | SCARA3     | 1.65 | 5.44E-04 |
| ILMN_1762255 | GSTM1       | 2.01 | 3.10E-02 | ILMN_2202915 | FAR2       | 1.59 | 6.34E-03 | ILMN_1809147 | FAM118A    | 1.64 | 1.22E-03 |
| ILMN_1682636 | CXCL2       | 1.98 | 1.41E-05 | ILMN_1761968 | PPP1R14A   | 1.59 | 2.50E-03 | ILMN_1695606 | EFNB3      | 1.64 | 2.29E-05 |
| ILMN_1720829 | ZFP63       | 1.97 | 3.20E-09 | ILMN_2189869 | FCF1       | 1.59 | 1.64E-03 | ILMN_1672743 | ZNF334     | 1.64 | 7.09E-04 |
| ILMN_1711838 | SLC25A24    | 1.95 | 1.06E-03 | ILMN_1747911 | CDC2C      | 1.59 | 2.19E-02 | ILMN_1797893 | PFAAP5     | 1.63 | 8.70E-12 |
| ILMN_3271179 | LOC10012877 | 1.95 | 2.42E-05 | ILMN_1703906 | HJURP      | 1.58 | 2.47E-02 | ILMN_1703955 | FBXO32     | 1.63 | 3.98E-03 |
| ILMN_2124585 | GREM1       | 1.94 | 5.05E-07 | ILMN_1771149 | MRPL19     | 1.58 | 4.83E-04 | ILMN_1662587 | PNPLA7     | 1.62 | 2.37E-06 |
| ILMN_2139970 | ALDH1A3     | 1.94 | 2.51E-06 | ILMN_2301083 | UBE2C      | 1.58 | 4.77E-02 | ILMN_1812795 | RUNX1T1    | 1.62 | 3.57E-03 |
| ILMN_2132982 | IGFBP5      | 1.93 | 2.57E-03 | ILMN_3240433 | GSTT2B     | 1.58 | 2.16E-02 | ILMN_1758128 | CYGB       | 1.62 | 1.28E-07 |
| ILMN_1723116 | AMFR        | 1.93 | 2.37E-02 | ILMN_1687213 | C6orf13    | 1.57 | 3.28E-03 | ILMN_1725338 | CLDN23     | 1.62 | 2.53E-04 |
| ILMN_3205475 | LOC279708   | 1.91 | 5.11E-04 | ILMN_2327994 | AZIN1      | 1.57 | 4.11E-02 | ILMN_2073592 | CAND2      | 1.62 | 6.88E-05 |
| ILMN_1690397 | DYNC111     | 1.91 | 1.73E-05 | ILMN_1765701 | LOC399942  | 1.56 | 1.73E-03 | ILMN_2384122 | GPR56      | 1.61 | 2.19E-04 |
| ILMN_2395139 | SERPIN87    | 1.90 | 1.79E-02 | ILMN_1673673 | PBK        | 1.56 | 4.90E-02 | ILMN_2153679 | TBC1D3B    | 1.61 | 1.59E-04 |
| ILMN_1807439 | ALDH1A3     | 1.87 | 6.14E-05 | ILMN_2409220 | HMMR       | 1.56 | 4.40E-02 | ILMN_1718046 | ARNT2      | 1.60 | 3.92E-04 |
| ILMN_1709800 | POMZP3      | 1.87 | 8.23E-04 | ILMN_2413158 | PODXL      | 1.56 | 4.45E-02 | ILMN_1772612 | ANGPTL2    | 1.60 | 7.02E-03 |
| ILMN_1710284 | HES1        | 1.87 | 2.36E-07 | ILMN_3248511 | FAM167A    | 1.56 | 4.31E-03 | ILMN_1797728 | HMGCS1     | 1.59 | 1.25E-06 |
| ILMN_1723035 | OLR1        | 1.86 | 7.72E-03 | ILMN_2412860 | MCM4       | 1.55 | 2.77E-03 | ILMN_1811767 | INHBE      | 1.59 | 2.00E-02 |
| ILMN_1751776 | CKAP2L      | 1.86 | 8.47E-03 | ILMN_2051373 | NEK2       | 1.55 | 3.56E-02 | ILMN_2336781 | SOD2       | 1.59 | 6.45E-03 |
| ILMN_1748840 | CALB2       | 1.86 | 3.23E-03 | ILMN_2144426 | HIST2H2AA3 | 1.55 | 1.35E-05 | ILMN_1718766 | MT1F       | 1.59 | 3.75E-03 |
| ILMN_1775501 | IL1B        | 1.84 | 3.71E-03 | ILMN_2173291 | CYP4B1     | 1.55 | 8.16E-03 | ILMN_1695271 | RPT25      | 1.58 | 1.63E-03 |
| ILMN_2063168 | MALL        | 1.83 | 1.58E-03 | ILMN_1676336 | AADACL1    | 1.55 | 2.57E-02 | ILMN_1776157 | Sep-4      | 1.58 | 4.27E-03 |
| ILMN_1747650 | BMP6        | 1.82 | 2.74E-06 | ILMN_1716265 | PGM2L1     | 1.55 | 7.77E-08 | ILMN_3233229 | SNHG7      | 1.58 | 1.31E-07 |
| ILMN_1787186 | NOV         | 1.82 | 3.00E-04 | ILMN_1800540 | CD55       | 1.55 | 7.22E-06 | ILMN_2224290 | ZNF322B    | 1.58 | 1.57E-05 |
| ILMN_2400407 | CNTN1       | 1.82 | 3.55E-03 | ILMN_1784454 | ITGB1      | 1.55 | 1.77E-06 | ILMN_1778087 | ANXA8      | 1.57 | 1.25E-02 |
| ILMN_1699421 | ANXA10      | 1.81 | 1.13E-03 | ILMN_1809590 | GINS2      | 1.54 | 3.12E-02 | ILMN_1653794 | C6orf160   | 1.57 | 3.89E-02 |
| ILMN_2174189 | DKK1        | 1.81 | 1.73E-06 | ILMN_2073184 | S1PR5      | 1.54 | 2.47E-04 | ILMN_3226181 | NUDT7      | 1.57 | 7.04E-06 |
| ILMN_1767685 | SERPIN87    | 1.81 | 2.39E-02 | ILMN_1680955 | AURKA      | 1.54 | 2.72E-02 | ILMN_1658504 | CHKA       | 1.57 | 2.69E-06 |
| ILMN_1651354 | SPP1        | 1.80 | 1.35E-04 | ILMN_1695414 | ASF1B      | 1.54 | 3.95E-02 | ILMN_1714335 | RDH10      | 1.56 | 2.98E-03 |
| ILMN_1686116 | THBS1       | 1.80 | 2.85E-04 | ILMN_1772821 | KIAA1671   | 1.54 | 1.08E-02 | ILMN_2159152 | TP53TG3    | 1.56 | 2.38E-06 |
| ILMN_1805377 | ZIP3        | 1.78 | 3.75E-03 | ILMN_1700413 | MAFF       | 1.53 | 9.33E-03 | ILMN_1654966 | SCARA3     | 1.56 | 2.96E-03 |
| ILMN_1775268 | HECW2       | 1.78 | 2.19E-05 | ILMN_1709683 | RASSF2     | 1.53 | 9.15E-04 | ILMN_1772459 | RPS23      | 1.56 | 1.53E-02 |
| ILMN_1660718 | GABBR2      | 1.77 | 1.39E-02 | ILMN_1682599 | GPRC5A     | 1.53 | 4.42E-03 | ILMN_1725889 | AFF2       | 1.56 | 5.29E-03 |
| ILMN_1716382 | LOC387882   | 1.77 | 7.75E-06 | ILMN_2406815 | LRRC17     | 1.53 | 2.08E-03 | ILMN_3234837 | PKDCC      | 1.55 | 2.57E-04 |
| ILMN_1746888 | PCOLCE2     | 1.75 | 6.55E-05 | ILMN_1715458 | PCDH10     | 1.53 | 1.00E-04 | ILMN_3246060 | LOC654433  | 1.55 | 8.80E-04 |
| ILMN_1725314 | GBP3        | 1.75 | 3.07E-07 | ILMN_2050911 | SLC22A4    | 1.53 | 2.69E-04 | ILMN_1731374 | CPE        | 1.55 | 4.24E-02 |
| ILMN_1798952 | KDEL3       | 1.75 | 4.36E-06 | ILMN_2413650 | STIL       | 1.52 | 1.03E-02 | ILMN_1678422 | DHX58      | 1.55 | 3.10E-07 |
| ILMN_1714880 | LIMS3       | 1.74 | 1.66E-08 | ILMN_1673998 | SSTR1      | 1.52 | 1.83E-04 | ILMN_1716843 | ELOVL2     | 1.55 | 3.50E-05 |
| ILMN_1737205 | MCM4        | 1.74 | 2.55E-04 | ILMN_2069745 | SSTR1      | 1.52 | 5.12E-04 | ILMN_3241692 | OC10012966 | 1.55 | 2.80E-02 |
| ILMN_1786628 | LOC653355   | 1.74 | 1.60E-04 | ILMN_2189870 | FCF1       | 1.52 | 1.89E-02 | ILMN_3243924 | P2RX6      | 1.55 | 9.04E-05 |
| ILMN_2249282 | TIPRL       | 1.73 | 3.26E-05 | ILMN_1695978 | LINGO2     | 1.51 | 7.06E-03 | ILMN_2159453 | STXBP2     | 1.54 | 7.07E-03 |
| ILMN_2378953 | KCNK2       | 1.72 | 2.58E-04 | ILMN_1738589 | MGLL       | 1.51 | 8.83E-03 | ILMN_1846922 | ---        | 1.54 | 2.99E-04 |
| ILMN_1728009 | TMEM171     | 1.72 | 1.44E-03 | ILMN_1751576 | TEK        | 1.51 | 4.82E-07 | ILMN_1809496 | COPG2      | 1.53 | 1.65E-03 |
| ILMN_1766675 | CDH6        | 1.72 | 7.14E-03 | ILMN_2143155 | KIF11      | 1.51 | 4.14E-02 | ILMN_1680874 | TUBB2B     | 1.52 | 2.09E-03 |
| ILMN_1790761 | POSTN       | 1.71 | 2.18E-03 | ILMN_2048591 | LRRN3      | 1.51 | 1.77E-02 | ILMN_1784384 | STARDS     | 1.52 | 2.54E-02 |
| ILMN_1789991 | MARCH4      | 1.70 | 4.58E-04 | ILMN_2167915 | DSEL       | 1.51 | 6.19E-04 | ILMN_3241957 | OC10013393 | 1.52 | 8.07E-06 |
| ILMN_2196328 | POSTN       | 1.70 | 7.83E-03 | ILMN_3238676 | ULBP2      | 1.51 | 2.98E-04 | ILMN_1754538 | C10orf58   | 1.52 | 7.41E-03 |
| ILMN_2189027 | LIPG        | 1.69 | 2.01E-02 | ILMN_3230300 | LOC729143  | 1.50 | 6.85E-06 | ILMN_1764769 | VWASA      | 1.52 | 2.92E-03 |
| ILMN_1714730 | UBE2C       | 1.68 | 2.20E-02 | ILMN_1737728 | CDC43      | 1.50 | 3.86E-02 | ILMN_1738147 | NES        | 1.52 | 3.29E-04 |
| ILMN_3245116 | GOLIM4      | 1.67 | 9.01E-09 | ILMN_1717990 | CALD1      | 1.50 | 3.31E-02 | ILMN_1814657 | TFAP4      | 1.52 | 7.62E-06 |
| ILMN_1794522 | EIF5A       | 1.67 | 1.91E-03 | ILMN_1667081 | CND2       | 2.69 | 1.68E-02 | ILMN_1757636 | C5orf35    | 1.52 | 3.64E-03 |
| ILMN_2349459 | BIRC5       | 1.67 | 1.76E-02 | ILMN_1701424 | LAMC2      | 2.63 | 1.10E-04 | ILMN_1716733 | MYO2       | 1.51 | 5.71E-04 |
| ILMN_2068104 | TFPI2       | 1.66 | 1.30E-04 | ILMN_2196479 | XRN2       | 2.62 | 5.08E-06 | ILMN_2326512 | CASP1      | 1.51 | 8.76E-05 |
| ILMN_1662970 | ZIP3        | 1.66 | 6.11E-03 | ILMN_1655867 | HRASLS     | 2.54 | 3.47E-07 | ILMN_1702320 | JAKMIP2    | 1.51 | 1.55E-02 |
| ILMN_1739645 | ANLN        | 1.66 | 2.47E-02 | ILMN_2067656 | CND2       | 2.41 | 4.89E-02 | ILMN_1794612 | UBA7       | 1.51 | 2.07E-08 |
| ILMN_1695475 | SEMA3C      | 1.65 | 1.27E-05 | ILMN_1767556 | C10orf10   | 2.35 | 3.63E-05 | ILMN_1734445 | LOC91461   | 1.51 | 9.60E-04 |
| ILMN_1665079 | TELO2       | 1.65 | 1.05E-02 | ILMN_1745994 | GAS7       | 2.27 | 6.63E-03 | ILMN_1690523 | LRRC20     | 1.50 | 6.79E-05 |
|              |             |      |          |              |            |      |          | ILMN_1784428 | MGC57346   | 1.50 | 6.29E-04 |

(B) List of the genes with significantly different transcriptome level between two groups.

| Link to KEGG Pathway     | Pathway Description (KEGG)   | Nb Genes in Pathway | Nb Regulated Genes (Up / Down) | P-Value (All) | P-Value (Up) | P-Value (Down) | Min P-Value |
|--------------------------|------------------------------|---------------------|--------------------------------|---------------|--------------|----------------|-------------|
| <a href="#">hsa00980</a> | Metabolism of xenobiotics by | 60                  | 4 (4/0)                        | NA            | 1.75E-02     | NA             | 1.75E-02    |
| <a href="#">hsa04512</a> | ECM-receptor interaction     | 84                  | 5 (4/1)                        | 3.47E-02      | 4.18E-02     | NA             | 3.47E-02    |
| <a href="#">hsa04640</a> | Hematopoietic cell lineage   | 86                  | 4 (4/0)                        | NA            | 4.44E-02     | NA             | 4.44E-02    |

| Link to REACTOME Pathway    | Pathway Description (REACTOME) | Nb Genes in Pathway | Nb Regulated Genes (Up / Down) | P-Value (All) | P-Value (Up) | P-Value (Down) | Min P-Value |
|-----------------------------|--------------------------------|---------------------|--------------------------------|---------------|--------------|----------------|-------------|
| <a href="#">REACT_152</a>   | Cell Cycle, Mitotic            | 304                 | 12 (11/1)                      | 1.03E-03      | 4.05E-04     | NA             | 4.05E-04    |
| <a href="#">REACT_17015</a> | Metabolism of proteins         | 217                 | 4 (0/4)                        | NA            | NA           | 1.61E-02       | 1.61E-02    |

| Term Type          | GO ID with Link            | Go Term                                     | Nb Genes in Term | Nb Regulated Genes (Up / Down) | P-Value  |
|--------------------|----------------------------|---------------------------------------------|------------------|--------------------------------|----------|
| cellular_component | <a href="#">GO:000576</a>  | extracellular region                        | 2010             | 44 (32/12)                     | 1.68E-05 |
| cellular_component | <a href="#">GO:004421</a>  | extracellular region part                   | 960              | 27 (22/5)                      | 2.47E-05 |
| biological_process | <a href="#">GO:000280</a>  | nuclear division                            | 220              | 12 (11/1)                      | 5.53E-05 |
| biological_process | <a href="#">GO:0007067</a> | mitosis                                     | 220              | 12 (11/1)                      | 5.53E-05 |
| biological_process | <a href="#">GO:0000087</a> | M phase of mitotic cell cycle               | 224              | 12 (11/1)                      | 6.52E-05 |
| biological_process | <a href="#">GO:0048285</a> | organelle fission                           | 229              | 12 (11/1)                      | 7.93E-05 |
| biological_process | <a href="#">GO:0007049</a> | cell cycle                                  | 776              | 23 (18/5)                      | 1.02E-04 |
| biological_process | <a href="#">GO:0000278</a> | mitotic cell cycle                          | 370              | 15 (13/2)                      | 1.13E-04 |
| biological_process | <a href="#">GO:0022402</a> | cell cycle process                          | 565              | 18 (14/4)                      | 3.34E-04 |
| cellular_component | <a href="#">GO:0031012</a> | extracellular matrix                        | 345              | 13 (10/3)                      | 5.17E-04 |
| biological_process | <a href="#">GO:0042221</a> | response to chemical stimulus               | 1281             | 29 (19/10)                     | 8.76E-04 |
| molecular_function | <a href="#">GO:0005102</a> | receptor binding                            | 886              | 22 (16/6)                      | 1.02E-03 |
| biological_process | <a href="#">GO:0022403</a> | cell cycle phase                            | 414              | 14 (12/2)                      | 1.15E-03 |
| molecular_function | <a href="#">GO:0005125</a> | cytokine activity                           | 195              | 9 (9/0)                        | 1.69E-03 |
| biological_process | <a href="#">GO:0000279</a> | M phase                                     | 329              | 12 (11/1)                      | 1.69E-03 |
| molecular_function | <a href="#">GO:0030247</a> | polysaccharide binding                      | 154              | 8 (6/2)                        | 1.83E-03 |
| molecular_function | <a href="#">GO:0001871</a> | pattern binding                             | 154              | 8 (6/2)                        | 1.83E-03 |
| biological_process | <a href="#">GO:0007346</a> | regulation of mitotic cell cycle            | 152              | 8 (8/0)                        | 2.05E-03 |
| molecular_function | <a href="#">GO:0005515</a> | protein binding                             | 8154             | 112 (74/38)                    | 2.07E-03 |
| biological_process | <a href="#">GO:0048731</a> | system development                          | 2330             | 43 (28/15)                     | 2.11E-03 |
| biological_process | <a href="#">GO:0010564</a> | regulation of cell cycle process            | 114              | 7 (7/0)                        | 2.19E-03 |
| biological_process | <a href="#">GO:0050793</a> | regulation of developmental process         | 674              | 18 (15/3)                      | 2.32E-03 |
| biological_process | <a href="#">GO:0051301</a> | cell division                               | 295              | 11 (9/2)                       | 2.47E-03 |
| biological_process | <a href="#">GO:0045766</a> | positive regulation of angiogenesis         | 26               | 4 (4/0)                        | 3.34E-03 |
| biological_process | <a href="#">GO:0007155</a> | cell adhesion                               | 700              | 18 (14/4)                      | 3.42E-03 |
| biological_process | <a href="#">GO:0022610</a> | biological adhesion                         | 701              | 18 (14/4)                      | 3.47E-03 |
| biological_process | <a href="#">GO:0042493</a> | response to drug                            | 216              | 9 (5/4)                        | 3.89E-03 |
| biological_process | <a href="#">GO:0007275</a> | multicellular organismal development        | 2865             | 49 (32/17)                     | 4.29E-03 |
| biological_process | <a href="#">GO:0009991</a> | response to extracellular stimulus          | 220              | 9 (6/3)                        | 4.35E-03 |
| cellular_component | <a href="#">GO:0005615</a> | extracellular space                         | 685              | 17 (14/3)                      | 4.38E-03 |
| biological_process | <a href="#">GO:0009888</a> | tissue development                          | 665              | 17 (14/3)                      | 4.91E-03 |
| molecular_function | <a href="#">GO:0005539</a> | glycosaminoglycan binding                   | 140              | 7 (6/1)                        | 5.13E-03 |
| biological_process | <a href="#">GO:0048856</a> | anatomical structure development            | 2527             | 44 (28/16)                     | 5.50E-03 |
| biological_process | <a href="#">GO:0051726</a> | regulation of cell cycle                    | 331              | 11 (10/1)                      | 5.57E-03 |
| biological_process | <a href="#">GO:0045765</a> | regulation of angiogenesis                  | 63               | 5 (5/0)                        | 6.27E-03 |
| biological_process | <a href="#">GO:0007399</a> | nervous system development                  | 1088             | 23 (11/12)                     | 8.10E-03 |
| biological_process | <a href="#">GO:0007096</a> | regulation of exit from mitosis             | 12               | 3 (3/0)                        | 8.29E-03 |
| biological_process | <a href="#">GO:0031667</a> | response to nutrient levels                 | 197              | 8 (5/3)                        | 8.44E-03 |
| biological_process | <a href="#">GO:0043933</a> | macromolecular complex subunit organization | 710              | 17 (10/7)                      | 9.00E-03 |
| cellular_component | <a href="#">GO:0000267</a> | cell fraction                               | 1083             | 22 (12/10)                     | 9.68E-03 |
| cellular_component | <a href="#">GO:0005578</a> | proteinaceous extracellular matrix          | 320              | 10 (8/2)                       | 1.00E-02 |

**Figure S6**

Putative pathways affected with transcriptome differences between obese and non-obese donors



**Figure S7**

Western blot analysis of PNPLA7 protein levels in samples from non-obese and obese donors – full-length blot (see [Figure 6D](#) for annotation).
